# Supplementary material
Source: PubMed Central journal article supplement (PMC7295609)
Supplement: NIHMS1585480-supplement-Supp_Table_1.pdf [file NIHMS1585480-supplement-Supp_Table_1.pdf]

| <b>Locus</b>   | <b>Deletion</b>          | <b>Forward Primer</b>       | <b>Reverse Primer</b>      | <b>LNA Probe</b>    | <b>Amplicon Size (bp)</b> |
|----------------|--------------------------|-----------------------------|----------------------------|---------------------|---------------------------|
| chr7_13872039  | CAGGCCAGTT<br>TCATCCCTTC | ATTCCCAAAGC<br>GTCGAACT     | CTACCATTGGA<br>AGGACGATCAC | TAA+G+GA+CA+T+CC+AT | 65                        |
| chr19_39237841 | G                        | CAATTCTTTAGG<br>TGTACCCTGTG | AAACAATGGAG<br>CAGATGACATT | TT+C+T+CG+C+T+GT    | 76                        |

**Supplementary Table 1. Parameters for cell-free DNA mutation detection assay**

Loci, deleted bases, primer/probe sequences, and amplicon size for the two analyzed mutations. '+' after a base in the probe sequence indicates that the base is a locked nucleic acid base. LNA, Locked Nucleic Acid.
